# Supplementary material for: Directional crystallization of C8-BTBT-C8 thin films in a temperature gradient
Source: Royal Society of Chemistry journal article supplement (doi:10.1039/d0qm00472c), 2020-10-05
Supplement: d0qm00472c1.pdf [file d0qm00472c1.pdf]

## Supporting Information

# Directional Crystallization of C8-BTBT-C8 Thin Films in a Temperature Gradient

Guillaume Schweicher,<sup>a</sup> Guangfeng Liu,<sup>a\*</sup> Pierre Fastrés,<sup>a</sup> Roland Resel,<sup>b</sup> Mamatimin

Abbas,<sup>c</sup> Guillaume Wantz<sup>c</sup> and Yves Henri Geerts<sup>a,d</sup>

a). Laboratoire de chimie des polymères, Faculté des Sciences, Université Libre de Bruxelles (ULB), CP 206/01, Boulevard du Triomphe, 1050, Brussels, Belgium

b). Institute of Solid State Physics, Graz University of Technology, Petersgasse 16, 8010 Graz, Austria.

c). Université de Bordeaux, IMS, CNRS, UMR-5218, Bordeaux INP, ENSCBP, 33405 Talence, France

d). International Solvay Institutes of Physics and Chemistry, ULB, CP 231, Boulevard du Triomphe, 1050 Brussels, Belgium

## Table of contents

**Table S1:** Calibration and experimental thermal gradient conditions.

**Figure S1:** Calibration of 135 °C -105 °C  $T_h - T_c$  couple (a) and 135 °C -75 °C  $T_h - T_c$  couple (b), using the reference compound C12-BTBT-C12. Scale bar: 500  $\mu\text{m}$ . (c) DSC data of compound C12-BTBT-C12

**Figure S2:** TGA trace of C8-BTBT-C8.

**Figure S3:** Optical profilometer 3D views of the C8-BTBT-C8 thin films produced using different spin-coating concentrations before (left images) and after (right images) the  $\nabla T$  treatments ( $T_h - T_c$  couple: 120 °C - 90 °C; pulling rate  $V_p$ : 25  $\mu\text{m.s}^{-1}$ ).

**Table S2:** Surface roughness values ( $R_a$ ), film thickness, FWHM, and the vertical crystallite size of the C8-BTBT-C8 thin films produced using different spin-coating concentrations before and after the  $\nabla T$  treatments ( $T_h - T_c$  couple: 120 °C - 90 °C; pulling rate  $V_p$ : 25  $\mu\text{m.s}^{-1}$ ).

**Figure S4:** Surface morphology of the C8-BTBT-C8 spin-coated thin films **10-19**. (a) optical profilometry images; (b) POM images.

**Figure S5.** Optical profilometer 3D views of films **10 - 19** after the  $\nabla T$  treatments produced using the same spin-coating

concentration of 20 mg.ml<sup>-1</sup> but treated by different  $\nabla T$  conditions.

**Table S3:** Surface roughness values (Ra), film thickness, FWHM, and the vertical crystallite size after the  $\nabla T$  treatments of the C8-BTBT-C8 thin films **10 - 19** produced using the same spin-coating concentration of 20 mg.ml<sup>-1</sup> but treated by different  $\nabla T$  conditions.

**Figure S6:** sXRD pattern of the polycrystalline powder C8-BTBT-C8 recorded at room temperature including the indexation of the most specific reflections.

**Figure S7:** sXRD scans of the films **1-10**. Indexation of the specific reflections is included.

**Figure S8:** The intense diffraction peak at  $q_z$  around 4.34 nm<sup>-1</sup> belongs to the 002 reflection of C8-BTBT-C8 in films **1-10**.

**Figure S9:** in-plane GIXD ( $2\theta/\phi$  scan) patterns of films **5** and **10** were recorded at room temperature.

**Figure S10:** sXRD scans of samples **5** and **11 - 19** produced using the same spin-coating concentration of 20 mg.ml<sup>-1</sup> before (No.**5**) and after  $\nabla T$  treatments (No.**11 - No.19**).

**Figure S11:** (a) Low angular range sXRD curves of C8-BTBT-C8 spin-coated thin films **10-19**. (b) Evolution of the film thickness as a function of the pulling rate ( $V_p$ ) for two Th - Tc

couples. All data were obtained at room temperature.

**Figure S12:** The diffraction peak in films 5, and 10-19 at  $q_z$  around  $4.34 \text{ nm}^{-1}$  belongs to the 002 reflection of C8-BTBT-C8.

**Figure S13:** Schematic representation of the pole figure measurement geometry.

**Figure S14:** Pole figure measurements of the C8-BTBT-C8 films 10-19 based on  $\{113\}$  reflections. The black solid dot highlights the temperature gradient direction.

## 1) Calibration of thermal gradient setup

A calibration of the magnitude of the selected  $\nabla T$  setup was needed. Since uncertainties related to heat transfer at the glass to glass and glass to metal interfaces can result in the real magnitude of the gradient ( $G_{exp}$ ) being smaller than  $G$ , which is directly calculated by the equation as  $G = (T_h - T_c)/x$ , where  $x = 2.0$  mm is the gap between the hot and cold stages. Therefore, the method, mentioned in our previous report<sup>S1</sup> was used to calibrate the magnitude of  $G_{cal}$ , using C12-BTBT-C12. The latter was used instead of C8-BTBT-C8 because it allows to visualize both the melt-to-liquid crystal and the liquid-crystal-to-crystal boundaries, at 111.1 °C and 117.4°C, respectively. The  $T_h - T_c$  couples had to be adapted while preserving the same difference of temperature  $\Delta T$  to ensure the visualization of both phase transition boundaries, as shown in Figure S2. Data are collected in Table S1 where  $d$  is the distance separating both phase transition fronts. The magnitude of  $\nabla T$  effectively applied in alignment experiments of C8-BTBT-C8 ( $G_{exp}$ ) is assumed to be very similar to  $G_{cal}$ , obtained with C12-BTBT-C12. This is a reasonable assumption because both compounds form similar SmA and crystalline phases.<sup>s2</sup>

**Table S1.** Calibration and experimental thermal gradient conditions.

| Parameters | Calibration | Experiments | Calibration | Experiments |
|------------|-------------|-------------|-------------|-------------|
| $T_h$ (°C) | 135         | 120         | 135         | 120         |
| $T_c$ (°C) | 105         | 90          | 75          | 60          |

|                                                   |                 |                     |                  |                      |
|---------------------------------------------------|-----------------|---------------------|------------------|----------------------|
| $\Delta T$ (°C)                                   | 30              | 30                  | 60               | 60                   |
| $d$ (mm)                                          | 1.04            | -                   | 0.59             | -                    |
| Magnitude of $\nabla T$<br>(°C.mm <sup>-1</sup> ) | $G_{cal} = 6.1$ | $G_{exp} \approx 6$ | $G_{cal} = 10.7$ | $G_{exp} \approx 11$ |

**S1** Panini, P.; Chattopadhyay, B.; Werzer, O.; Geerts, Y., Crystal Growth Alignment of  $\beta$ -Polymorph of Resorcinol in Thermal Gradient. *Cryst. Growth Des* **2018**, *18*, 2681-2689.

**S2** Izawa, T.; Miyazaki, E.; Takimiya, K., Molecular Ordering of High-Performance Soluble Molecular Semiconductors and Re-evaluation of Their Field-Effect Transistor Characteristics. *Adv. Mater* **2008**, *20*, 3388-3392.

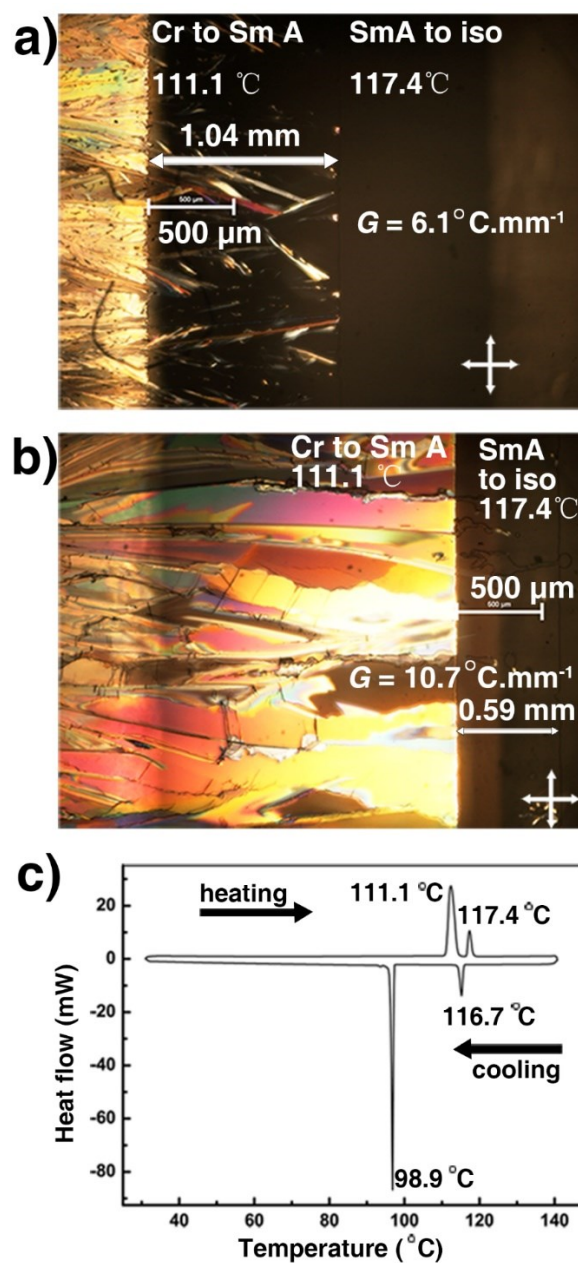

**Figure S1.** Calibration of 135 °C - 105 °C  $T_h - T_c$  couple (a) and 135 °C - 75 °C  $T_h - T_c$  couple (b), using the reference compound C12-BTBT-C12. Scale bar: 500  $\mu\text{m}$ . (c) DSC data of compound C12-BTBT-C12.

### 3) Thermogravimetric analysis

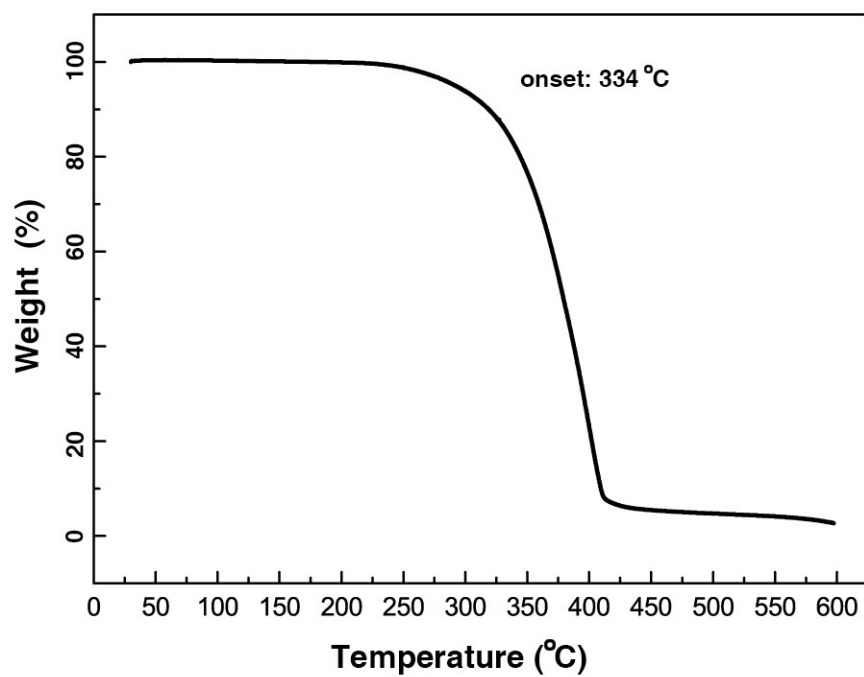

**Figure S2.** TGA trace of C8-BTBT-C8.

#### **4) Surface morphology, roughness and thickness of thin films**

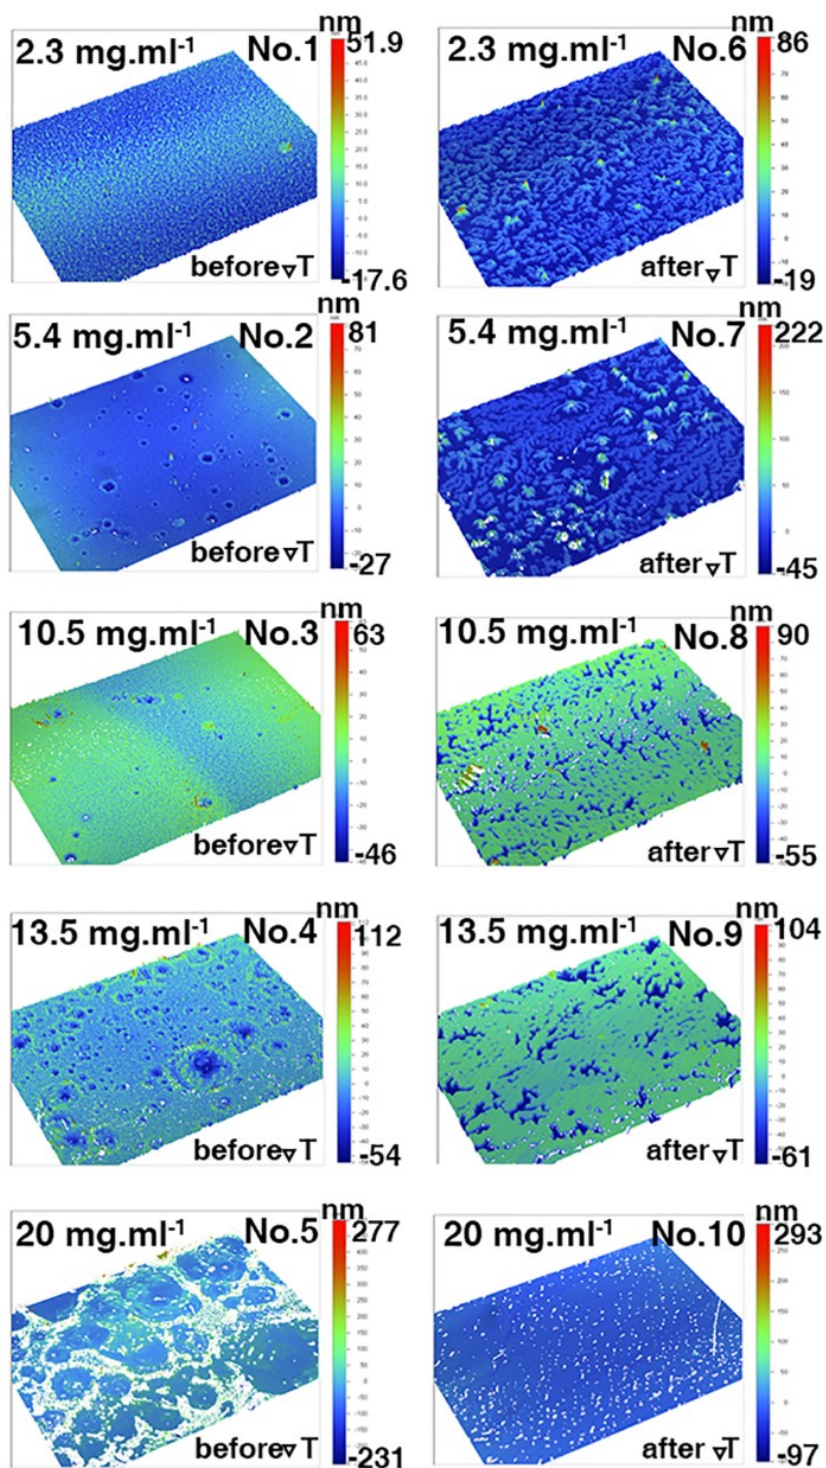

**Figure S3.** Optical profilometer 3D views of the C8-BTBT-C8 thin films produced using different spin-coating concentrations before (left images) and after (right images) the  $\nabla T$  treatments ( $T_h - T_c$  couple: 120 °C - 90 °C; pulling rate  $V_p$ : 25  $\mu\text{m.s}^{-1}$ ).

**Table S2.** Surface roughness values (Ra), film thickness, FWHM (full width at half the

maximum of the diffraction peak,  $\Delta q$ ), and crystallite size of the C8-BTBT-C8 thin films produced using different spin-coating concentrations before and after the  $\nabla T$  treatments ( $T_h - T_c$  couple: 120 °C - 90 °C; pulling rate  $V_p$ : 25  $\mu\text{m.s}^{-1}$ ). Surface roughness values are extracted using optical profilometer images. Film thickness and FWHM data are extracted by *s*XRD measurements, respectively. Vertical crystallite size values are calculated by the Scherrer equation.

| <b>Sample (No.)</b> | <b>Concentration (mg.ml<sup>-1</sup>)</b> | <b>Surface roughness values (Ra) (nm)</b> | <b>Film thickness (nm)</b> | <b>FWHM of (002), <math>\Delta q</math> (nm<sup>-1</sup>)</b> | <b>Vertical crystallite size (nm)</b> |
|---------------------|-------------------------------------------|-------------------------------------------|----------------------------|---------------------------------------------------------------|---------------------------------------|
| <b>1</b>            | 2.3                                       | 4.71 ( $\pm 0.560$ )                      | 13.3 ( $\pm 0.4$ )         | 0.954 ( $\pm 0.043$ )                                         | 13.1 ( $\pm 0.6$ )                    |
| <b>2</b>            | 5.4                                       | 4.30 ( $\pm 0.010$ )                      | 26.3 ( $\pm 0.2$ )         | 0.484 ( $\pm 0.027$ )                                         | 26.0 ( $\pm 1.4$ )                    |
| <b>3</b>            | 10.5                                      | 5.470 ( $\pm 0.010$ )                     | /                          | 0.235 ( $\pm 0.011$ )                                         | 53.7 ( $\pm 2.5$ )                    |
| <b>4</b>            | 13.5                                      | 8.075 ( $\pm 0.090$ )                     | /                          | 0.184 ( $\pm 0.006$ )                                         | 68.3 ( $\pm 2.3$ )                    |
| <b>5</b>            | 20                                        | 25.96 ( $\pm 2.890$ )                     | /                          | 0.135 ( $\pm 0.004$ )                                         | 92.7 ( $\pm 3.1$ )                    |
| <b>6</b>            | 2.3                                       | 6.475 ( $\pm 0.005$ )                     | 25.9 ( $\pm 0.9$ )         | 0.342 ( $\pm 0.057$ )                                         | 36.2 ( $\pm 6.6$ )                    |
| <b>7</b>            | 5.4                                       | 16.24 ( $\pm 0.590$ )                     | 42.3 ( $\pm 0.2$ )         | 0.255 ( $\pm 0.010$ )                                         | 49.4 ( $\pm 1.9$ )                    |
| <b>8</b>            | 10.5                                      | 16.13 ( $\pm 1.805$ )                     | 69 ( $\pm 1$ )             | 0.174 ( $\pm 0.004$ )                                         | 72.6 ( $\pm 1.7$ )                    |
| <b>9</b>            | 13.5                                      | 13.575 ( $\pm 0.165$ )                    | 84.3 (0.6)                 | 0.160 ( $\pm 0.004$ )                                         | 78.7 ( $\pm 2.0$ )                    |
| <b>10</b>           | 20                                        | 5.465 ( $\pm 0.025$ )                     | /                          | 0.111 ( $\pm 0.003$ )                                         | 113.4 ( $\pm 4.9$ )                   |

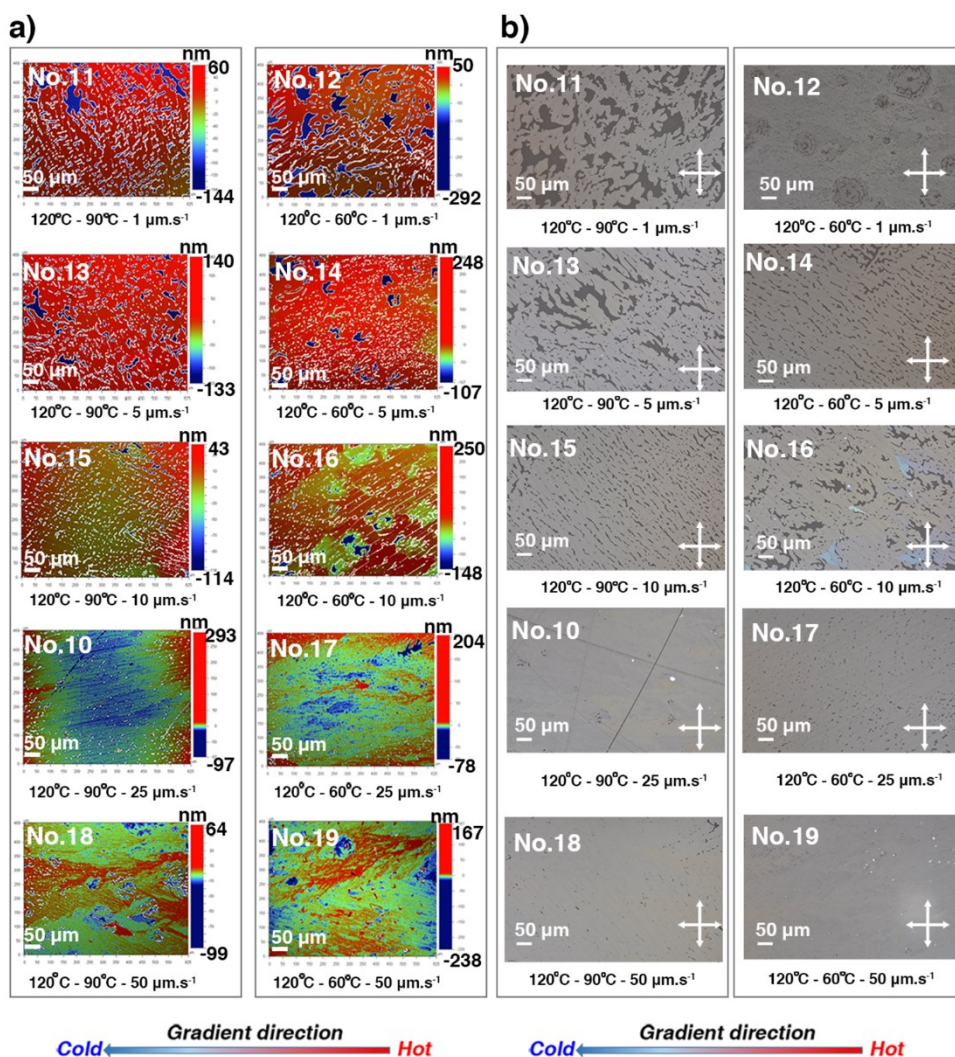

**Figure S4.** Surface morphology of the C8-BTBT-C8 spin-coated thin films **10-19**. (a) optical profilometry images; (b) POM images. Pictures were recorded at room temperature. The gradient direction is highlighted (bottom).

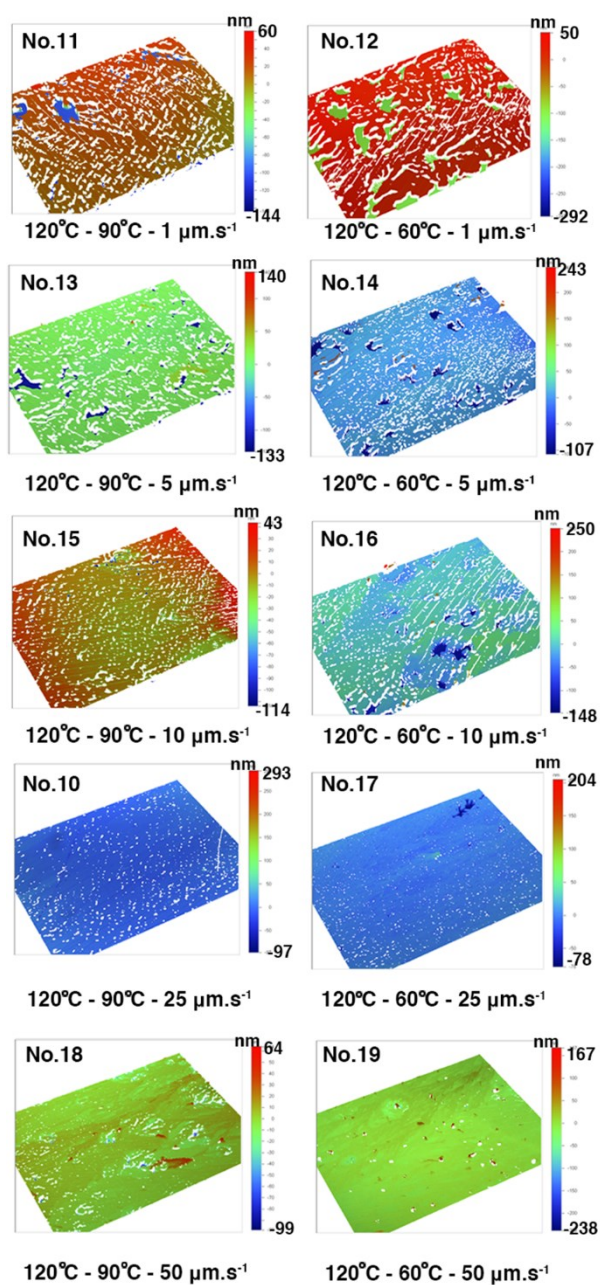

**Figure S5.** Optical profilometer 3D views of films **10 - 19** after the  $\nabla T$  treatments. The films were produced using the same spin-coating concentration of  $20 \text{ mg.ml}^{-1}$  but were treated by different  $\nabla T$  conditions.

**Table S3.** Surface roughness values (Ra), film thickness, FWHM, and crystallite size

after the  $\nabla T$  treatments of the C8-BTBT-C8 thin films **10 - 19** produced using the same spin-coating concentration of 20 mg.ml<sup>-1</sup> but treated by different  $\nabla T$  conditions. Surface roughness values are extracted by optical profilometer images. Film thickness and FWHM data are extracted by *s*XRD (002) measurements, respectively. The vertical crystallite size values are calculated by the Scherrer equation.

| Sample (No.) | T <sub>h</sub> (°C) | T <sub>c</sub> (°C) | V <sub>p</sub> (μm.s <sup>-1</sup> ) | Thickness (nm) | Roughness Ra (nm) | FWHM of (002), Δq (nm <sup>-1</sup> ) | Vertical crystallite size (nm) |
|--------------|---------------------|---------------------|--------------------------------------|----------------|-------------------|---------------------------------------|--------------------------------|
| <b>11</b>    | 120                 | 90                  | 1                                    | 150 (±10)      | 24.365 (±0.255)   | 0.115 (±0.007)                        | 109.1 (±6.8)                   |
| <b>12</b>    | 120                 | 60                  | 1                                    | 151 (±12)      | 26.3 (±1.460)     | 0.114 (±0.009)                        | 111.0 (±8.6)                   |
| <b>13</b>    | 120                 | 90                  | 5                                    | 143 (±3)       | 18.68 (±0.100)    | 0.114 (±0.013)                        | 110.7 (±12.2)                  |
| <b>14</b>    | 120                 | 60                  | 5                                    | 149 (±8)       | 14.12 (±1.180)    | 0.122 (±0.004)                        | 103.1 (±3.9)                   |
| <b>15</b>    | 120                 | 90                  | 10                                   | /              | 10.56 (±0.140)    | 0.104 (±0.003)                        | 121 (±3.4)                     |
| <b>16</b>    | 120                 | 60                  | 10                                   | 134 (±2)       | 17.585 (±0.995)   | 0.120 (±0.009)                        | 105.4 (±7.4)                   |
| <b>10</b>    | 120                 | 90                  | 25                                   | /              | 5.465 (±0.025)    | 0.111 (±0.003)                        | 113.4 (±4.9)                   |
| <b>17</b>    | 120                 | 60                  | 25                                   | /              | 3.935 (±0.155)    | 0.117 (±0.003)                        | 107.6 (±2.5)                   |
| <b>18</b>    | 120                 | 90                  | 50                                   | /              | 4.62 (±0.140)     | 0.117 (±0.002)                        | 107.7 (±2.2)                   |
| <b>19</b>    | 120                 | 60                  | 50                                   | /              | 4.74 (±0.210)     | 0.125 (±0.002)                        | 100.8 (±1.6)                   |

## 5) X- ray measurements

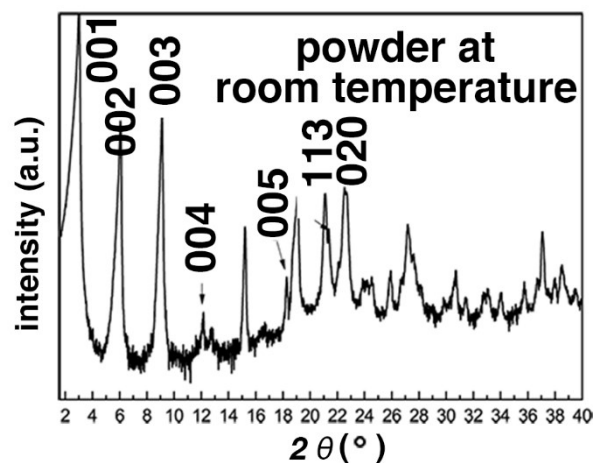

**Figure S6.** *s*XRD pattern of the polycrystalline powder of C8-BTBT-C8 recorded at room temperature. Indexation of the most specific reflections is included.

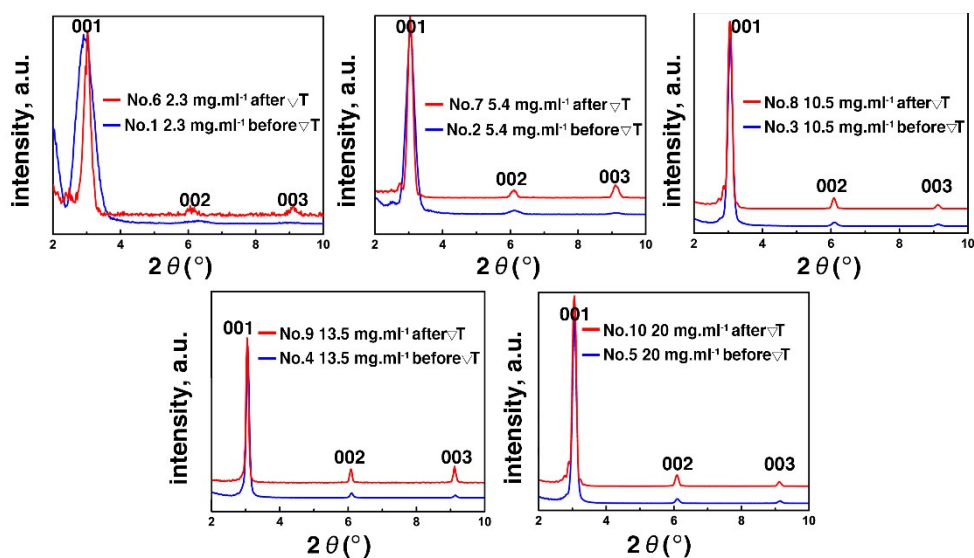

**Figure S7.** *s*XRD scans of the films 1-10. Indexation of the specific reflections is included.

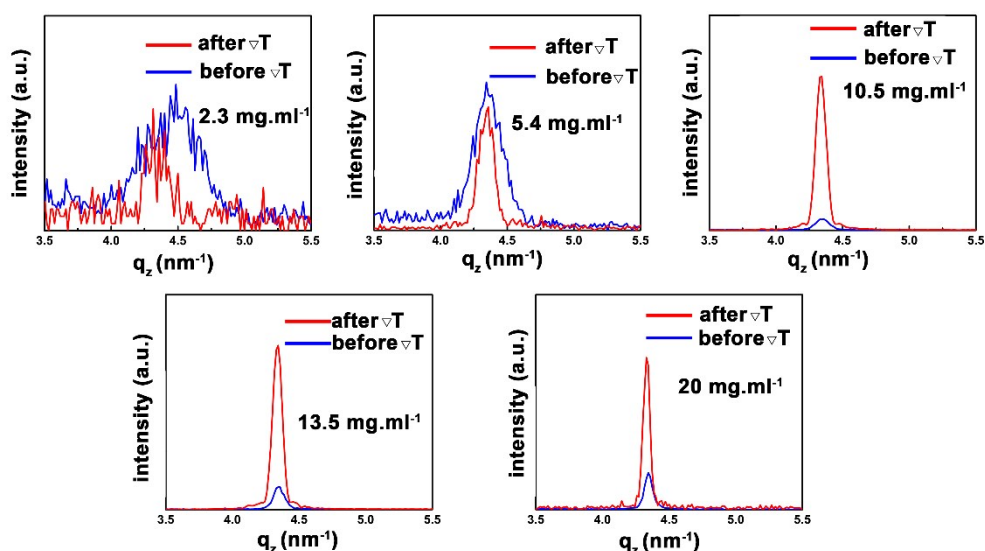

**Figure S8.** The intense diffraction peak at  $q_z$  around  $4.34 \text{ nm}^{-1}$  belongs to the 002 reflection of C8-BTBT-C8 in films **1-10**.

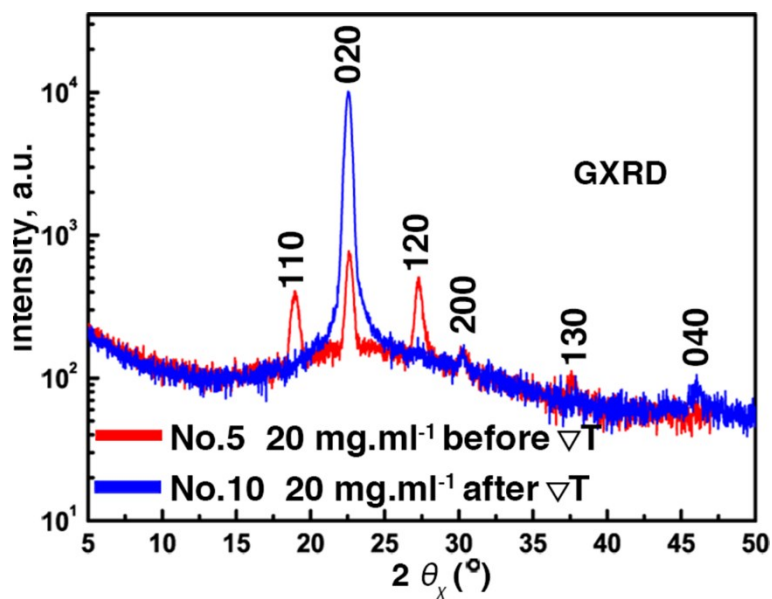

**Figure S9.** In-plane GIXD ( $2\theta/\phi$  scan) patterns of films **5** and **10** recorded at room temperature.

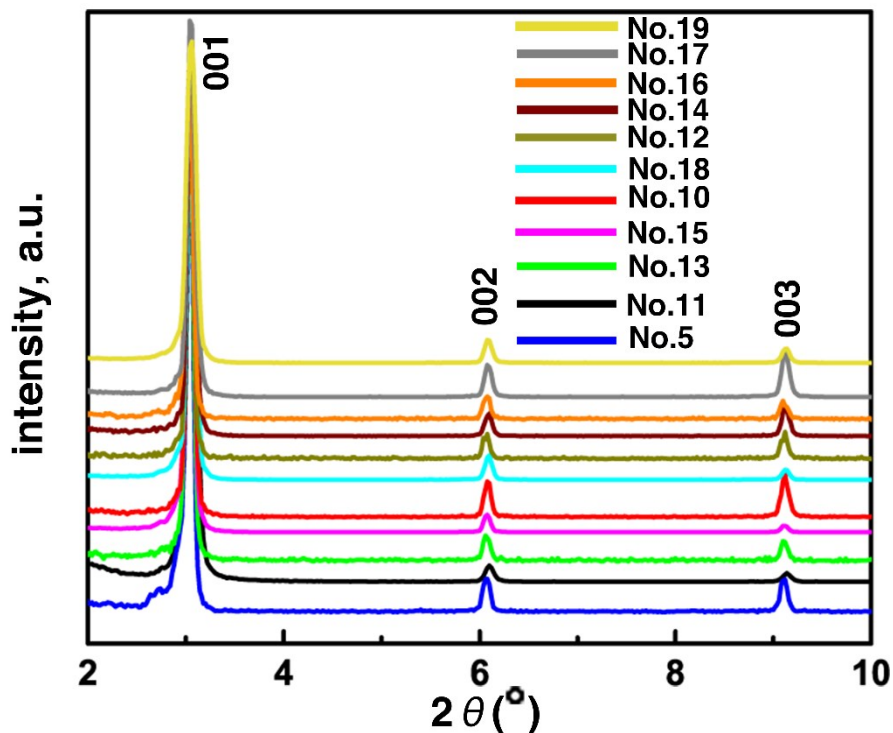

**Figure S10.** *s*XRD scans of samples **5** and **11 - 19** produced using the same spin-coating concentration of 20 mg.mL<sup>-1</sup> before (No.**5**) and after  $\nabla T$  treatments (No.**11 - No.19**).

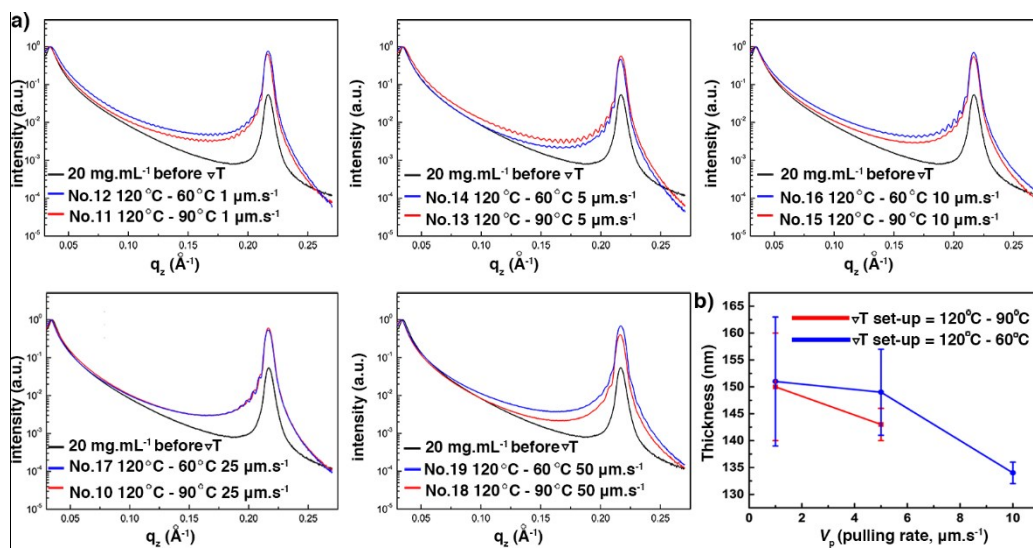

**Figure S11.** (a) Low angular range *s*XRD curves of C8-BTBT-C8 thin films **10-19**. (b) Evolution of the film thickness as a function of the pulling rate ( $V_p$ ) for two  $T_h - T_c$  couples. All data were obtained at room temperature.

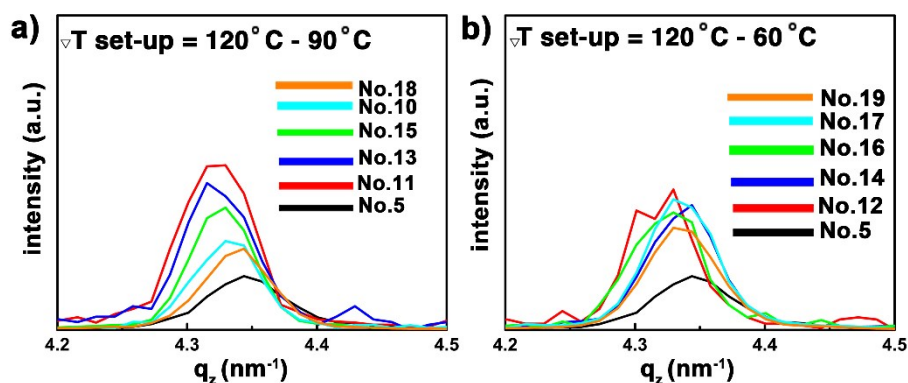

**Figure S12.** The diffraction peak in films 5, and 10-19 at  $q_z$  around  $4.34 \text{ nm}^{-1}$  belongs to the 002 reflection of C8-BTBT-C8.

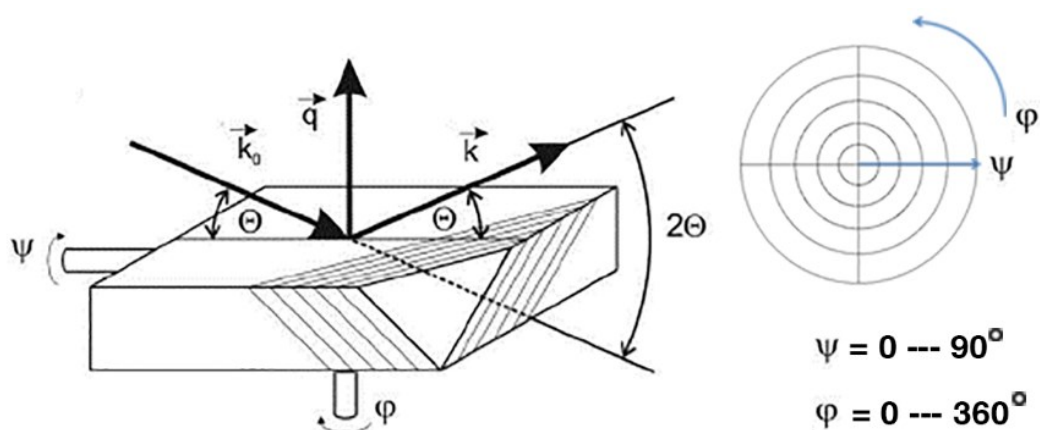

**Figure S13.** Schematic representation of the pole figure measurement geometry.

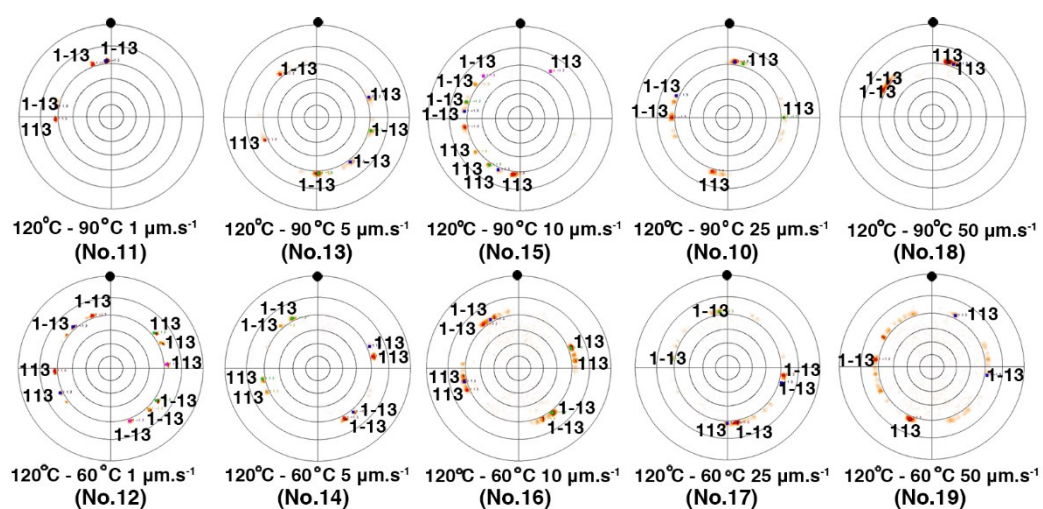

**Figure S14.** Pole figure measurements of the C8-BTBT-C8 films **10-19** based on  $\{113\}$  reflections. The black solid dot highlights the temperature gradient direction.
